# Supplementary material
Source: MDPI journal article supplement (https://www.mdpi.com/2073-4441/15/10/1863)
Supplement: s1 [file s1]

In situ parameters, fecal coliforms, majority ions and PTE during the dry season (may, 2022).

|                   | Coliforms      | T     | pH      | TDS   | EC     | Ca <sup>2+</sup> | Mg <sup>2+</sup> | Na <sup>+</sup> | K <sup>+</sup> | NO <sub>3</sub> <sup>-</sup> | Cl <sup>-</sup> | HCO <sub>3</sub> <sup>-</sup> | SO <sub>4</sub> <sup>2-</sup> | B     | Mn      | Ba   | Fe    | Zn    | F <sup>-</sup> | Li    | Sr    | Ni    | Si    | Al    | Cd    |
|-------------------|----------------|-------|---------|-------|--------|------------------|------------------|-----------------|----------------|------------------------------|-----------------|-------------------------------|-------------------------------|-------|---------|------|-------|-------|----------------|-------|-------|-------|-------|-------|-------|
|                   | CFU/<br>100 ml | °C    |         | mg/L  | (µS/m) |                  |                  |                 |                |                              |                 | mg/L                          |                               |       |         |      |       |       |                |       |       |       |       |       |       |
| NOM-127-SSA1-2021 | 0              | ----- | 6.5-8.5 | 1000  | -----  | -----            | -----            | -----           | ----           | 11                           | -----           | -----                         | 400                           | ----- | 0.15    | 1.3  | 0.30  | ----- | 1.5            | ----- | ----- | 0.07  | ----- | 0.2   | 0.005 |
| WHO 2017          | 0              | ----- | 7-8     | 1000  | -----  | -----            | -----            | 200             | ----           | 50                           | 250*            | -----                         | 250                           | ----- | 0.1-0.4 | 2.4  | 0.30* | 3-5   | -----          | ----- | ----- | 0.07  | ----- |       | 0.003 |
| BC1               | 0              | 20.2  | 6.5     | 42.8  | 86.3   | 19.4             | 0.2              | 4.4             | 1.4            | 0.9                          | 1.5             | 75.3                          | 1.1                           | 2.4   | <1.c.   | 0.02 | <1.c. | 0.003 | 0.141          | 0.007 | 0.02  | <1.c. | 28.1  | <1.c. | <1.c. |
| BC2               | 0              | 24.6  | 7.2     | 329.9 | 672.3  | 135.0            | 9.7              | 12.4            | 0.7            | 26.0                         | 34.3            | 354.5                         | 82.0                          | <1.c. | <1.c.   | 0.18 | <1.c. | <1.c. | 0.457          | 0.020 | 0.43  | <1.c. | 11.4  | <1.c. | <1.c. |
| BC3               | 87             | 23.4  | 6.9     | 253.7 | 516.8  | 108.2            | 11.0             | 2.9             | 0.7            | 5.11                         | 5.5             | 381.2                         | 15.0                          | 0.05  | 0.002   | 0.09 | 0.01  | 0.002 | 0.216          | 0.007 | 0.18  | <1.c. | 7.4   | <1.c. | <1.c. |
| BC4               | 45             | 16.8  | 7.0     | 20.5  | 40.8   | 13.5             | 0.1              | 5.3             | 1.3            | 0.7                          | 1.6             | 58.3                          | <1.c.                         | 0.01  | 0.001   | 0.03 | 0.03  | <1.c. | 0.103          | 0.001 | 0.02  | <1.c. | 21.9  | 0.02  | 0.02  |
| BC5               | 26             | 20.6  | 6.6     | 214.7 | 437.1  | 71.0             | 15.7             | 8.3             | 2.5            | 5.3                          | 3.1             | 325.4                         | 14.0                          | <1.c. | 0.011   | 0.13 | 0.04  | 0.007 | 0.285          | 0.002 | 0.33  | <1.c. | 29.1  | <1.c. | <1.c. |
| BC6               | 870            | 21.5  | 6.9     | 140.0 | 284.7  | 82.4             | 2.3              | 13.2            | 2.3            | 1.0                          | 2.5             | 359.3                         | 5.0                           | 0.01  | 0.027   | 0.05 | 0.41  | 0.005 | 0.323          | 0.008 | 0.23  | <1.c. | 31.9  | 0.09  | 0.09  |
| BC7               | 67             | 21.2  | 7.7     | 260.5 | 530.6  | 116.4            | 8.6              | 19.3            | <1.c.          | 0.8                          | 8.1             | 444.3                         | 26.0                          | 0.01  | 0.015   | 0.01 | 0.01  | 0.004 | 0.408          | 0.012 | 0.22  | <1.c. | 14.3  | <1.c. | <1.c. |
| BC8               | 0              | 20.6  | 6.5     | 284.7 | 580.1  | 135.5            | 6.2              | 5.4             | 6.4            | 4.4                          | 3.1             | 466.1                         | 32.0                          | 0.01  | <1.c.   | 0.03 | <1.c. | 0.017 | 0.425          | 0.014 | 0.32  | <1.c. | 7.1   | <1.c. | <1.c. |
| BC9               | 27             | 17.5  | 7.2     | 184.2 | 375.0  | 112.0            | 5.3              | 3.3             | 0.6            | 0.6                          | 2.2             | 273.1                         | 51.0                          | 0.03  | 0.002   | 0.04 | 0.01  | 0.012 | 0.192          | 0.012 | 0.23  | <1.c. | 8.3   | <1.c. | <1.c. |
| BC10              | 45             | 23.3  | 7.9     | 144.3 | 293.4  | 81.0             | 1.4              | 7.9             | <1.c.          | 9.6                          | 1.7             | 279.2                         | 3.0                           | 0.21  | <1.c.   | 0.03 | <1.c. | <1.c. | 0.126          | 0.001 | 0.06  | <1.c. | 5.7   | <1.c. | <1.c. |
| BC11              | 28             | 23.5  | 6.6     | 282.1 | 574.8  | 138.0            | 10.3             | 6.4             | <1.c.          | 1.0                          | 2.1             | 519.5                         | 12.2                          | <1.c. | 0.001   | 0.05 | 0.01  | 0.007 | 0.366          | 0.013 | 0.58  | <1.c. | 14.6  | <1.c. | <1.c. |
| BC12              | 310            | 25.4  | 7.0     | 223.2 | 454.6  | 101.1            | 6.1              | 1.5             | <1.c.          | 3.8                          | 2.2             | 299.0                         | 5.6                           | <1.c. | 0.001   | 0.05 | <1.c. | 0.009 | 0.170          | 0.003 | 0.13  | <1.c. | 9.3   | <1.c. | <1.c. |
| BC13              | 870            | 20.6  | 6.08    | 57.9  | 116.2  | 41.0             | 0.3              | 12.0            | 0.9            | 8.7                          | 4.4             | 121.4                         | 9.3                           | <1.c. | <1.c.   | 0.01 | 0.01  | <1.c. | 0.119          | 0.005 | 0.02  | <1.c. | 24.3  | 0.04  | <1.c. |
| BC14              | 13             | 21.9  | 6.2     | 81.4  | 165.1  | 28.5             | 9.0              | 8.0             | 0.9            | 6.3                          | 1.5             | 157.8                         | 1.9                           | 0.01  | <1.c.   | 0.01 | <1.c. | 0.003 | 0.090          | 0.010 | 0.13  | <1.c. | 42.1  | <1.c. | <1.c. |
| BC15              | 22             | 26.0  | 7.3     | 287.8 | 586.3  | 130.5            | 12.4             | 6.6             | <1.c.          | 21.6                         | 2.0             | 430.4                         | 47.9                          | <1.c. | <1.c.   | 0.03 | <1.c. | <1.c. | 0.249          | 0.017 | 0.46  | <1.c. | 12.4  | <1.c. | <1.c. |
| BC16              | 16             | 24.5  | 7.1     | 135.1 | 247.7  | 59.9             | 1.0              | 14.3            | 0.6            | 2.0                          | 2.2             | 233.1                         | 8.4                           | <1.c. | <1.c.   | 0.01 | <1.c. | 0.004 | 0.209          | 0.029 | 0.13  | <1.c. | 33.0  | <1.c. | <1.c. |
| BC17              | 39             | 24.2  | 7.1     | 478.0 | 974.0  | 164.1            | 14.7             | 29.3            | 3.3            | 0.56                         | 36.5            | 291.3                         | 241.7                         | 0.01  | 0.115   | 0.02 | 0.003 | 0.823 | 0.467          | 0.069 | 0.41  | 0.010 | 11.6  | <1.c. | 0.012 |
| BC18              | 19             | 28.1  | 6.7     | 632.1 | 1289   | 239.4            | 55.9             | 17.9            | 1.8            | 9.2                          | 19.7            | 341.5                         | 574.5                         | 0.12  | 0.001   | 0.02 | 0.004 | 0.014 | 0.546          | 0.063 | 2.30  | <1.c. | 10.1  | <1.c. | <1.c. |
| BC19              | 2300           | 26.6  | 6.8     | 271.4 | 552.8  | 103.1            | 24.2             | 1.1             | <1.c.          | 1.8                          | 1.2             | 439.6                         | 2.6                           | 0.10  | <1.c.   | 0.02 | <1.c. | <1.c. | 0.076          | 0.001 | 0.12  | <1.c. | 4.5   | <1.c. | <1.c. |
| BC20              | 20             | 26.6  | 6.9     | 291.9 | 594.7  | 105.9            | 15.2             | 18.9            | 1.1            | 2.5                          | 7.9             | 360.6                         | 44.8                          | <1.c. | 0.002   | 0.02 | <1.c. | <1.c. | 0.208          | 0.002 | 0.56  | <1.c. | 28.5  | <1.c. | <1.c. |
| Min               | 0              | 16.8  | 6.08    | 20.52 | 40.86  | 13.50            | 0.14             | 1.1             | 0.6            | 0.56                         | 1.2             | 58.26                         | 1.1                           | 0.01  | 0.001   | 0.01 | 0.003 | 0.002 | 0.07           | 0.001 | 0.024 | 0.010 | 4.50  | 0.023 | 0.012 |
| Max               | 2300           | 28.1  | 7.91    | 632.1 | 1289   | 239.4            | 55.9             | 29.3            | 6.40           | 26.0                         | 36.5            | 519.5                         | 574.5                         | 2.4   | 0.115   | 0.18 | 0.410 | 0.823 | 0.54           | 0.069 | 2.306 | 0.010 | 42.10 | 0.094 | 0.012 |
| Mean              | 240.2          | 22.8  | 6.90    | 230.8 | 468.6  | 99.29            | 10.4             | 9.92            | 1.75           | 5.62                         | 7.16            | 310.5                         | 58.90                         | 0.24  | 0.016   | 0.04 | 0.055 | 0.070 | 0.25           | 0.014 | 0.349 | 0.010 | 17.76 | 0.055 | 0.012 |

\*Recommendations of WHO 2017. <1.c: Below the quantification limit. BC3 and BC12 springs are intended for recreational purposes

In situ parameters, fecal coliforms, majority ions and PTE during the rainy season (august, 2022).

|                   | Coliforms      | T     | pH             | TDS         | EC     | Ca <sup>2+</sup> | Mg <sup>2+</sup> | Na <sup>+</sup> | K <sup>+</sup> | NO <sub>3</sub> <sup>-</sup> | Cl <sup>-</sup> | HCO <sub>3</sub> <sup>-</sup> | SO <sub>4</sub> <sup>2-</sup> | B     | Mn          | Ba         | Fe           | Z          | F <sup>-</sup> | Li    | Sr    | Ni          | Si    | Al         | Cd           |
|-------------------|----------------|-------|----------------|-------------|--------|------------------|------------------|-----------------|----------------|------------------------------|-----------------|-------------------------------|-------------------------------|-------|-------------|------------|--------------|------------|----------------|-------|-------|-------------|-------|------------|--------------|
|                   | CFU/<br>100 ml | °C    |                | mg/L        | (µS/m) |                  |                  |                 |                |                              |                 | mg/L                          |                               |       |             |            |              |            |                |       |       |             |       |            |              |
| NOM-127-SSA1-2021 |                | ----- | <b>6.5-8.5</b> | <b>1000</b> | -----  | -----            | -----            | -----           | ----           | <b>11</b>                    | -----           | -----                         | <b>400</b>                    | ----- | <b>0.15</b> | <b>1.3</b> | <b>0.30</b>  | -----      | <b>1.5</b>     | ----- | ----- | <b>0.07</b> | ----- | <b>0.2</b> | <b>0.005</b> |
| WHO 2017          |                | ----- | <b>7-8</b>     | <b>1000</b> | -----  | -----            | -----            | <b>200</b>      | ----           | <b>50</b>                    | <b>250*</b>     | -----                         | <b>250</b>                    | ----- | -----       | <b>2.4</b> | <b>0.03*</b> | <b>3-5</b> | -----          | ----- | ----- | <b>0.07</b> | ----- |            | <b>0.003</b> |
| <b>BC1</b>        | 7              | 19.8  | 6.5            | 47          | 95.0   | 13.0             | 0.2              | 8.5             | 2.9            | 0.3                          | 0.4             | 72.8                          | 0.3                           | <1.c. | <1.c.       | 0.02       | <1.c.        | 0.008      | <1.c.          | 0.008 | 0.030 | 0.013       | 31.0  | <1.c.      | <1.c.        |
| <b>BC2</b>        | 20             | 22    | 6.6            | 1.2         | 40.03  | 133.6            | 9.3              | 24.6            | 1.4            | <b>42.1</b>                  | 36.6            | 325.3                         | 69.1                          | 0.06  | <1.c.       | 0.18       | <1.c.        | 0.004      | 0.348          | 0.022 | 0.470 | 0.006       | 13.1  | <1.c.      | <1.c.        |
| <b>BC3</b>        | 288            | 23.4  | 6.6            | 265.3       | 540.4  | 114.6            | 7.5              | 3.0             | 0.8            | 7.5                          | 2.3             | 410.7                         | 11.3                          | <1.c. | <1.c.       | 0.04       | <1.c.        | <1.c.      | 0.076          | 0.002 | 0.136 | <1.c.       | 6.7   | <1.c.      | <1.c.        |
| <b>BC4</b>        | 10             | 16.8  | 7.0            | 24.45       | 48.8   | 13.6             | 0.2              | 5.8             | 2.7            | 0.2                          | 0.3             | 55.6                          | 0.4                           | <1.c. | 0.001       | 0.03       | <b>0.05</b>  | <1.c.      | <1.c.          | 0.001 | 0.029 | 0.010       | 23.3  | 0.023      | 0.02         |
| <b>BC5</b>        | 103            | 20.7  | <b>6.4</b>     | 230.8       | 470.0  | 72.0             | 12.3             | 14.9            | 5.3            | 1.4                          | 2.0             | 339.9                         | 11.6                          | <1.c. | 0.06        | 0.11       | <b>0.12</b>  | <1.c.      | 0.118          | 0.002 | 0.324 | 0.011       | 26.0  | <1.c.      | <1.c.        |
| <b>BC6</b>        | 400            | 20.5  | <b>6.1</b>     | 167.1       | 334.9  | 82.9             | 7.6              | 25.7            | 4.1            | 3.0                          | 3.3             | 351.0                         | 32.4                          | <1.c. | 0.07        | 0.06       | <b>0.96</b>  | 0.008      | 0.134          | 0.007 | 0.223 | 0.013       | 31.2  | 0.094      | 0.09         |
| <b>BC7</b>        | 400            | 19.7  | 7.5            | 588.6       | 1200   | 119.7            | 10.3             | 34.8            | 0.8            | 5.3                          | 25.7            | 468.6                         | 34.9                          | <1.c. | 0.02        | 0.01       | 0.01         | <1.c.      | 0.291          | 0.015 | 0.287 | 0.007       | 16.0  | <1.c.      | <1.c.        |
| <b>BC8</b>        | 10             | 20.4  | <b>6.4</b>     | 330.5       | 673.5  | 134.2            | 5.9              | 2.6             | 0.7            | 5.0                          | 1.6             | 434.6                         | 30.8                          | 0.02  | 0.001       | 0.03       | <1.c.        | 0.27       | 0.349          | 0.015 | 0.344 | <1.c.       | 7.4   | <1.c.      | <1.c.        |
| <b>BC9</b>        | 520            | 16.4  | 7.1            | 197.1       | 401.3  | 73.7             | 4.4              | 3.0             | 1.2            | 1.5                          | 0.8             | 216.1                         | 37.1                          | 0.09  | 0.001       | 0.04       | 0.01         | 0.008      | 0.067          | 0.008 | 0.233 | <1.c.       | 8.8   | <1.c.      | <1.c.        |
| <b>BC10</b>       | 3              | 24.7  | 7.5            | 175.6       | 357.4  | 97.5             | 1.3              | 2.0             | 0.6            | <b>12.4</b>                  | 1.2             | 315.6                         | 6.5                           | <1.c. | <1.c.       | 0.03       | <1.c.        | 0.008      | <1.c.          | 0.001 | 0.076 | <1.c.       | 6.0   | <1.c.      | <1.c.        |
| <b>BC11</b>       | 30             | 24.4  | 6.7            | 303.8       | 619.1  | 144.0            | 6.2              | 6.1             | 0.04           | 0.7                          | 0.4             | 517.1                         | 10.8                          | <1.c. | 0.001       | 0.05       | <1.c.        | 0.004      | 0.379          | 0.013 | 0.576 | 0.006       | 15.0  | <1.c.      | <1.c.        |
| <b>BC12</b>       | 160            | 23.7  | 6.6            | 277.0       | 564.3  | 123.5            | 6.4              | 6.8             | 1.0            | 4.2                          | 1.0             | 461.3                         | 4.5                           | <1.c. | 0.001       | 0.05       | <1.c.        | 0.006      | 0.079          | 0.003 | 0.157 | 0.005       | 10.8  | <1.c.      | <1.c.        |
| <b>BC13</b>       | 360            | 21.7  | <b>6.1</b>     | 94.0        | 188.0  | 10.2             | 1.3              | 22.3            | 3.2            | <b>22.3</b>                  | 4.4             | 55.8                          | 18.3                          | <1.c. | 0.001       | 0.03       | 0.01         | 0.01       | <1.c.          | 0.004 | 0.070 | 0.009       | 22.3  | 0.048      | <1.c.        |
| <b>BC14</b>       | 10             | 22    | 7.1            | 93.7        | 190.1  | 16.7             | 8.0              | 13.9            | 1.9            | 5.5                          | 1.0             | 136.0                         | 2.0                           | <1.c. | <1.c.       | 0.01       | <1.c.        | <1.c.      | 0.074          | 0.010 | 0.144 | 0.017       | 44.0  | <1.c.      | <1.c.        |
| <b>BC15</b>       | 360            | 22    | 6.6            | 354.0       | 721.4  | 121.6            | 12.4             | 12.2            | 0.4            | <b>18.4</b>                  | 1.0             | 410.3                         | 42.4                          | <1.c. | <1.c.       | 0.03       | <1.c.        | 0.004      | 0.216          | 0.018 | 0.511 | 0.005       | 13.8  | <1.c.      | <1.c.        |
| <b>BC16</b>       | 40             | 21.4  | 7.0            | 168.9       | 343.7  | 56.2             | 0.9              | 25.3            | 1.1            | 2.2                          | 3.2             | 245.2                         | 10.1                          | <1.c. | <1.c.       | 0.01       | <1.c.        | <1.c.      | 0.148          | 0.032 | 0.152 | 0.013       | 35.9  | <1.c.      | <1.c.        |
| <b>BC17</b>       | 30             | 23.1  | 7.0            | 472.0       | 949.0  | 133.9            | 15.0             | 53.4            | 7.9            | 2.1                          | 31.6            | 327.8                         | 210.0                         | 0.13  | 0.001       | 0.01       | <1.c.        | 0.10       | 0.490          | 0.075 | 0.401 | 0.009       | 12.4  | <1.c.      | 0.012        |
| <b>BC18</b>       | 640            | 23.1  | 6.6            | 649.0       | 136.0  | 229.5            | 59.6             | 19.2            | 2.1            | 5.1                          | 21.0            | 395.7                         | <b>570.6</b>                  | 0.09  | 0.02        | 0.02       | 0.07         | 0.01       | 0.472          | 0.055 | 2.205 | 0.005       | 11.0  | <1.c.      | <1.c.        |
| <b>BC19</b>       | 120            | 23.8  | 7.2            | 257.0       | 514.0  | 105.1            | 15.8             | 0.9             | 0.2            | 1.2                          | 0.5             | 429.7                         | 3.5                           | <1.c. | <1.c.       | 0.02       | <1.c.        | 0.007      | 0.065          | 0.001 | 0.072 | <1.c.       | 4.2   | <1.c.      | <1.c.        |
| <b>BC20</b>       | 600            | 24.0  | 6.8            | 443.0       | 886.0  | 162.4            | 16.7             | 16.2            | 2.5            | <b>18.7</b>                  | 39.5            | 362.4                         | 93.3                          | <1.c. | 0.15        | 0.08       | 0.01         | 0.004      | 0.268          | 0.001 | 0.879 | 0.009       | 24.2  | <1.c.      | <1.c.        |
| <b>Min</b>        | 3              | 16.4  | 6.1            | 1.2         | 40.03  | 10.2             | 0.2              | 0.9             | 0.04           | 0.2                          | 0.3             | 55.6                          | 0.3                           | 0.02  | 0.001       | 0.01       | 0.01         | 0.004      | 0.065          | 0.001 | 0.029 | 0.005       | 4.2   | 0.023      | 0.012        |
| <b>Max</b>        | 640            | 24.7  | 7.5            | 649.0       | 1200   | 229.5            | 59.6             | 53.4            | 7.9            | 42.1                         | 39.5            | 517.1                         | 570.6                         | 0.13  | 0.15        | 0.18       | 0.96         | 0.273      | 0.490          | 0.075 | 2.205 | 0.017       | 44    | 0.094      | 0.012        |
| <b>Mean</b>       | 205.55         | 21.6  | 6.7            | 257.0       | 463.6  | 97.9             | 10.1             | 15.1            | 2.0            | 7.9                          | 8.9             | 316.6                         | 69.9                          | 0.08  | 0.02        | 0.04       | 0.15         | 0.03       | 0.223          | 0.015 | 0.366 | 0.009       | 18.1  | 0.05       | 0.012        |

\* Recommendations of WHO 2017. <1.c.: Below the quantification limit. BC3 and BC12 springs are intended for recreational purposes.
